# Supplementary material for: MDSC targeting with Gemtuzumab ozogamicin restores T cell immunity and immunotherapy against cancers
Source: PubMed Central journal article supplement (PMC6796554; doi:10.1016/j.ebiom.2019.08.025), 2019-08-25

A

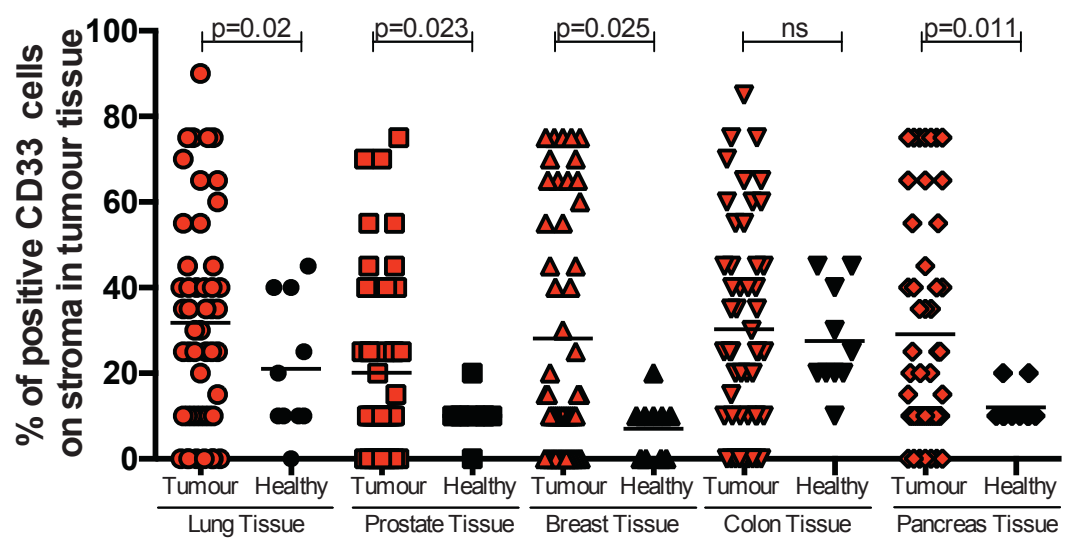

B

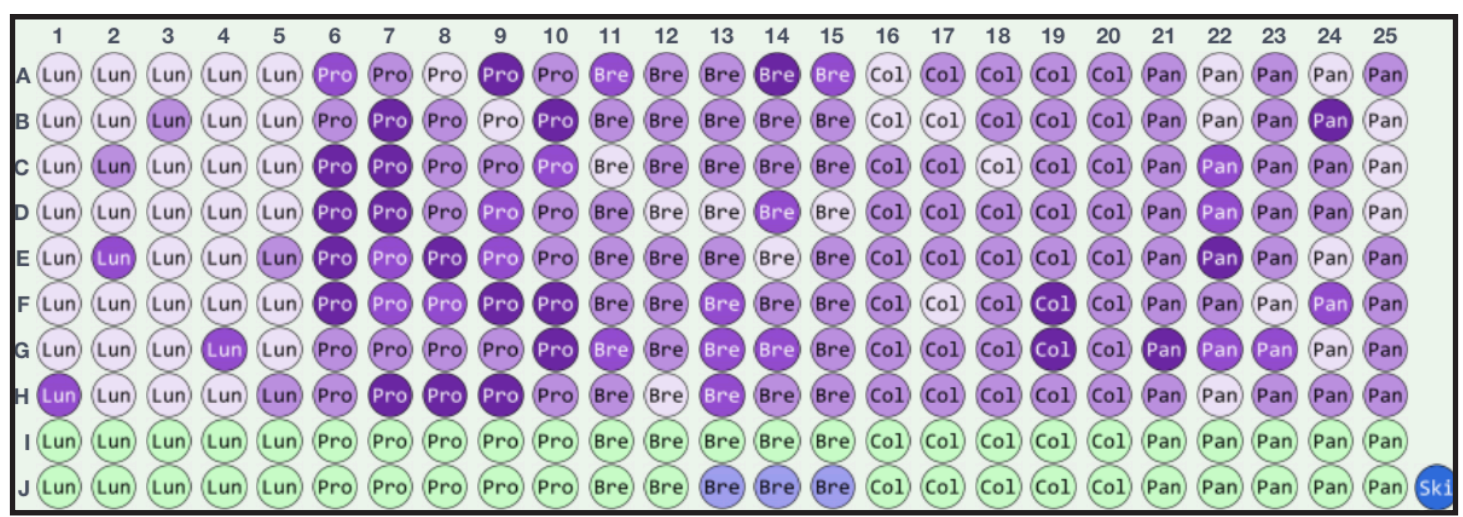

Supplement: mmc1.pdf [file mmc1.pdf]
