# Supplementary material for: MDSC targeting with Gemtuzumab ozogamicin restores T cell immunity and immunotherapy against cancers
Source: PubMed Central journal article supplement (PMC6796554; doi:10.1016/j.ebiom.2019.08.025), 2019-08-25

**HLH Patient 1**

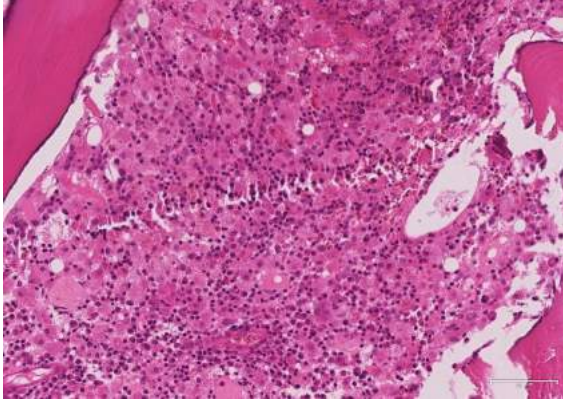

**HLH Patient 2**

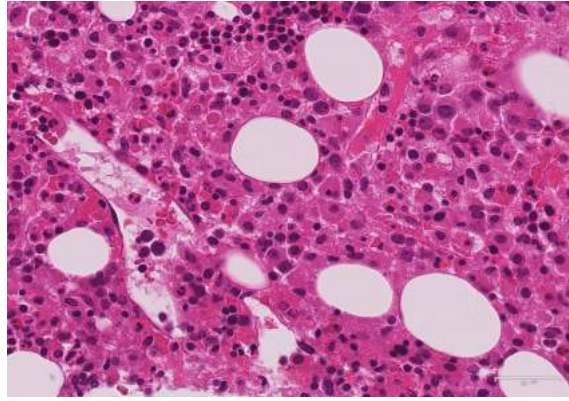

**HLH Patient 3**

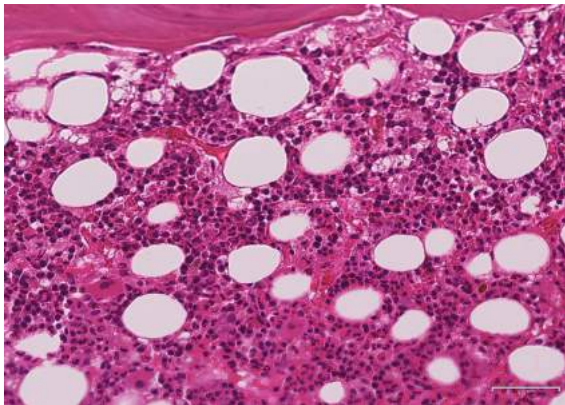

**HLH Patient 4**

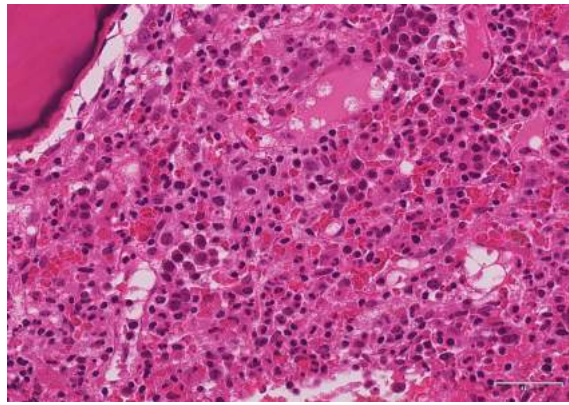

**HLH Patient 5**

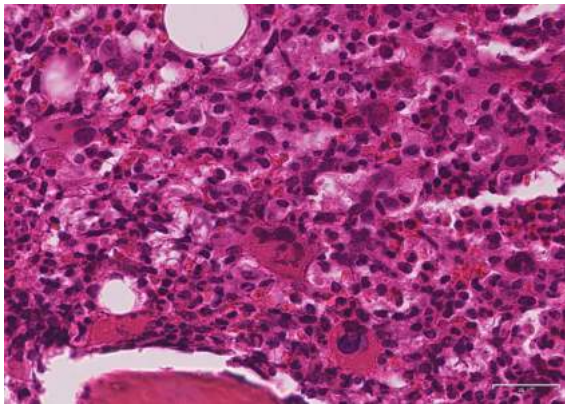

**HLH Patient 6**

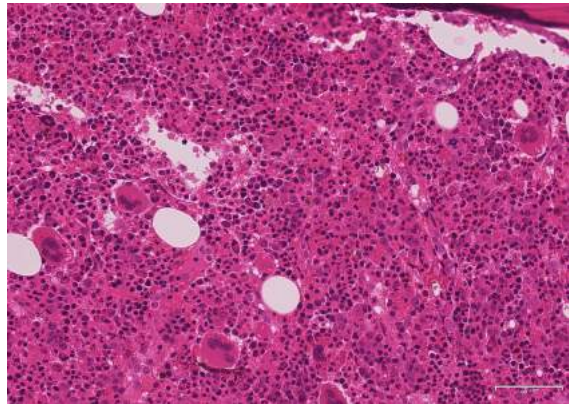

**HLH Patient 7**

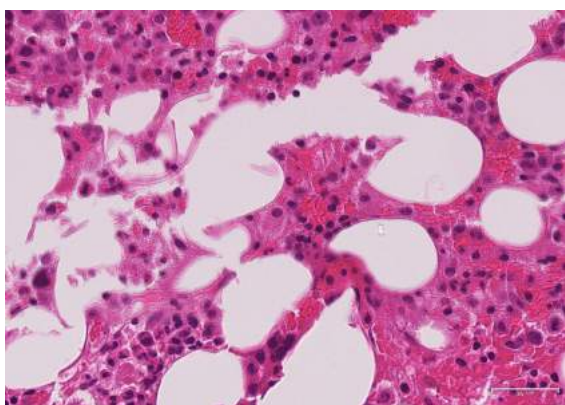

**HLH Patient 8**

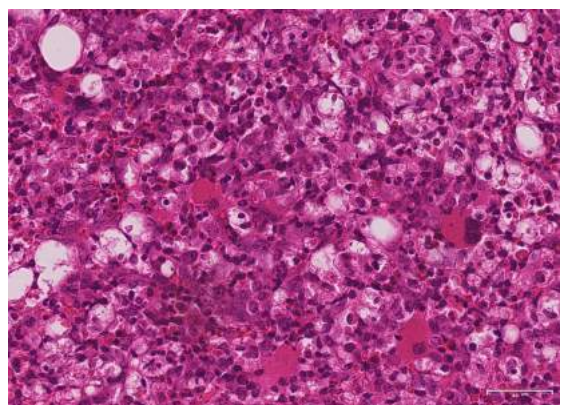

Supplement: mmc2.pdf [file mmc2.pdf]
