# Supplementary material for: MDSC targeting with Gemtuzumab ozogamicin restores T cell immunity and immunotherapy against cancers
Source: PubMed Central journal article supplement (PMC6796554; doi:10.1016/j.ebiom.2019.08.025), 2019-08-25

**A**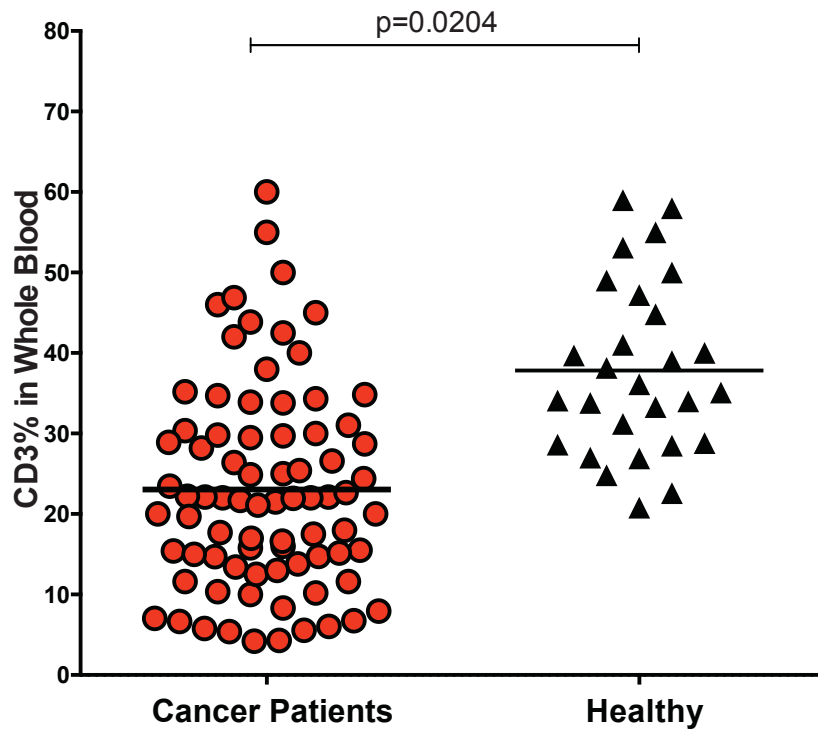**B**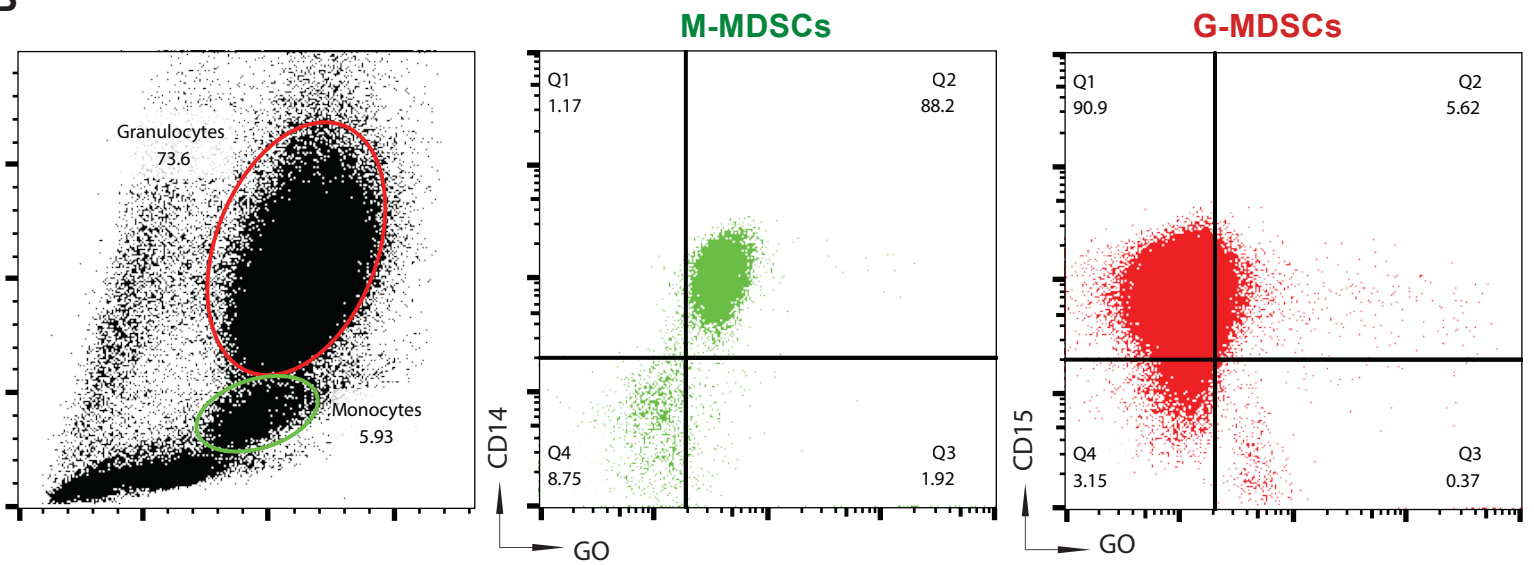**C**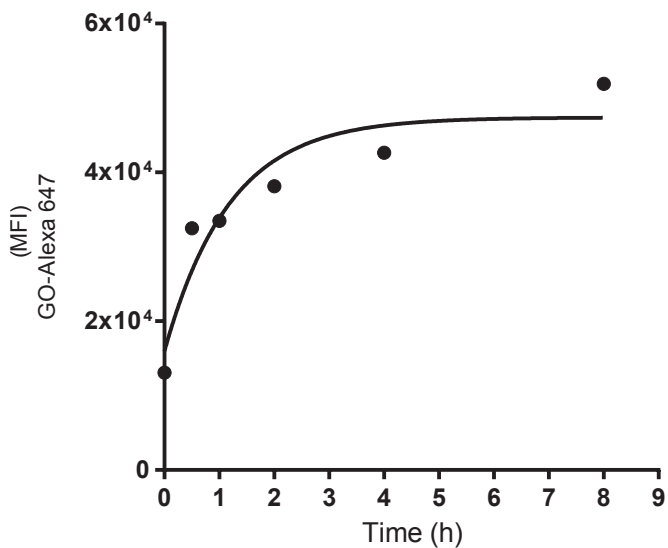**D**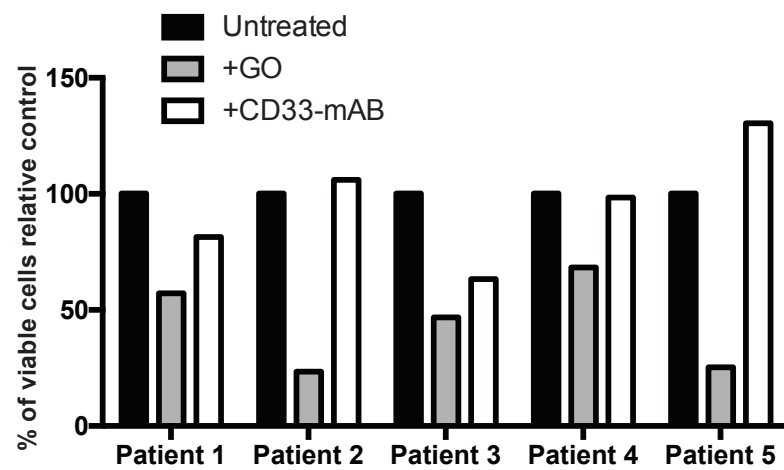

Supplement: mmc3.pdf [file mmc3.pdf]
